# Supplementary material
Source: publisher site journal article supplement (https://www.dovepress.com/article/315556)
Supplement: Supplementary file 1 [file get_supplementary_file.php]

# SUPPLEMENTARY MATERIAL

**Search syntax**

**Scopus**

title-abs-key ( nap* OR "daytime sleep*" OR "daytime nap*" OR siesta OR "midday sleep*" OR "midday nap*" OR "afternoon sleep*" OR "afternoon nap*" OR "daytime sleepiness" ) AND title-abs-key (athlet* OR sport* OR "elite athlet*" OR "competitive elite" OR player)

**PubMed**

(nap[tw] OR naps[tw] OR napping[tw] OR daytime sleep*[tw] OR daytime nap*[tw] OR siesta[tw] OR midday sleep*[tw] OR midday nap*[tw] OR afternoon sleep*[tw] OR afternoon nap*[tw] OR daytime sleepiness[tw]) AND (athlet*[tw] OR sport*[tw] OR elite athlet*[tw] OR competitive elite[tw] OR player[tw])

**Web of Science**

TS= (nap* OR "daytime sleep*" OR "daytime nap*" OR siesta OR "midday sleep*" OR "midday nap*" OR "afternoon sleep*" OR "afternoon nap*" OR "daytime sleepiness") AND TS= (athlet* OR sport* OR "elite athlet*" OR "competitive elite" OR player)

**EBSCO (PsychINFO and SPORTDiscus)**

TX= (nap OR "daytime sleep" OR "daytime nap" OR siesta OR "midday sleep" OR "midday nap" OR "afternoon sleep" OR "afternoon nap" OR "daytime sleepiness") AND TX= (athlet OR sport OR "elite athlet" OR "competitive elite" OR player)

[Limiters: Peer Reviewed]

| Downs and Black Checklist question | Fullagar et al. 201626 | Fullagar et al. 201625 | Knechtle et al. 201227 | Martin et al. 201730 | Poussel et al. 201528 | Venter et al. 201029 | Caia et al. 201731 | Carter et al. 202032 | Hurdiel et al. 201833 | Jones et al. 201934 | Kölling et al. 201635 | Lastella et al. 20155 | Mah et al. 201836 | O'Donnell et al. 201857 | Romyn et al. 201637 | Sargent et al. 20146 | Sargent et al. 201438 | Stevens et al. 201839 | Thornton et al. 201640 | Walsh et al. 201941 | Ajjimaporn et al. 202042 | Blanchfield et al. 201843 | Boukhris et al. 202044 | Brotherton et al. 201945 | Daaloul et al. 201846 | Davies et al. 201047 | Driller et al. 201648 | Fullagar et al. 201624 | Gupta et al. 20208 | Hammouda et al. 201849 | Pelka et al. 201750 | Pelka et al. 201751 | Petit et al. 201453 | Petit et al. 201852 | Romdhani et al. 202054 | Romyn et al. 201855 | Suppiah et al. 201856 |
| --- | --- | --- | --- | --- | --- | --- | --- | --- | --- | --- | --- | --- | --- | --- | --- | --- | --- | --- | --- | --- | --- | --- | --- | --- | --- | --- | --- | --- | --- | --- | --- | --- | --- | --- | --- | --- | --- |
|
| Q1 | Y | Y | Y | Y | Y | Y | Y | Y | Y | N | Y | Y | Y | Y | Y | Y | Y | Y | Y | Y | Y | Y | Y | Y | Y | Y | Y | Y | Y | Y | Y | Y | Y | Y | Y | Y | Y |
| Q2 | Y | Y | Y | Y | Y | N | Y | Y | Y | Y | Y | Y | Y | Y | Y | Y | Y | Y | Y | Y | Y | Y | Y | Y | Y | Y | Y | Y | Y | Y | Y | Y | Y | Y | Y | Y | Y |
| Q3 | Y | Y | N | N | N | Y | Y | Y | Y | Y | Y | N | Y | N | N | Y | Y | Y | N | Y | Y | Y | Y | Y | Y | Y | N | Y | Y | Y | N | Y | Y | Y | Y | Y | Y |
| Q4 | N/A | N/A | N/A | N/A | N/A | N/A | N/A | N/A | N/A | N/A | N/A | N/A | N/A | N/A | N/A | N/A | N/A | N/A | N/A | N/A | Y | Y | Y | Y | Y | Y | Y | Y | Y | Y | Y | Y | Y | Y | Y | Y | Y |
| Q5 | Y | N | Y | N | N | P | P | Y | P | P | P | Y | Y | P | N | Y | N | P | N | P | Y | P | N | Y | Y | Y | P | P | Y | P | P | Y | P | Y | P | Y | Y |
| Q6 | Y | Y | N | Y | N | Y | Y | Y | Y | Y | Y | Y | Y | Y | Y | Y | Y | Y | Y | Y | Y | Y | Y | Y | Y | Y | Y | Y | Y | Y | Y | Y | Y | Y | Y | Y | Y |
| Q7 | Y | Y | Y | Y | Y | Y | Y | Y | Y | Y | Y | Y | Y | Y | Y | Y | Y | Y | Y | Y | Y | Y | N | Y | Y | Y | Y | Y | Y | Y | Y | Y | Y | Y | Y | Y | Y |
| Q8 | N/A | N/A | N/A | N/A | N/A | N/A | N/A | N/A | N/A | N/A | N/A | N/A | N/A | N/A | N/A | N/A | N/A | N/A | N/A | N/A | N | Y | N | Y | Y | Y | U/D | U/D | U/D | N | Y | Y | Y | Y | U/D | Y | N |
| Q9 | N/A | N/A | N/A | N/A | N/A | N/A | N | U/D | N | U/D | U/D | U/D | U/D | N | U/D | U/D | U/D | U/D | U/D | U/D | N | N | N | N | Y | N | N | N | U/D | N | Y | Y | N | N | Y | U/D | Y |
| Q10 | Y | Y | Y | N | Y | N | N | Y | N | N | N | N | Y | N | Y | N | N | N | N | N | Y | Y | Y | Y | N | Y | N | Y | Y | N | N | Y | N | N | Y | Y | Y |
| Q11 | U/D | U/D | Y | Y | Y | Y | Y | Y | U/D | Y | Y | Y | Y | Y | Y | Y | Y | Y | Y | Y | Y | Y | Y | Y | Y | Y | U/D | N | Y | N | Y | Y | Y | Y | Y | Y | Y |
| Q12 | Y | Y | U/D | Y | N | Y | U/D | N | Y | Y | Y | Y | Y | Y | Y | Y | Y | Y | Y | Y | N | Y | Y | Y | Y | Y | Y | Y | U/D | Y | Y | Y | Y | Y | Y | Y | Y |
| Q13 | N/A | N/A | N/A | N/A | N/A | N/A | N/A | N/A | N/A | N/A | N/A | N/A | N/A | N/A | N/A | N/A | N/A | N/A | N/A | N/A | Y | Y | Y | Y | Y | Y | U/D | Y | Y | Y | U/D | Y | Y | Y | Y | Y | Y |
| Q14 | N/A | N/A | N/A | N/A | N/A | N/A | N/A | N/A | N/A | N/A | N/A | N/A | N/A | N/A | N/A | N/A | N/A | N/A | N/A | N/A | U/D | N | N | N | N | N | N | N | N | N | N | N | N | N | N | U/D | U/D |
| Q15 | N/A | N/A | N/A | N/A | N/A | N/A | N/A | N/A | N/A | N/A | N/A | N/A | N/A | N/A | N/A | N/A | N/A | N/A | N/A | N/A | U/D | N | N | N | N | N | N | N | N | N | N | N | N | N | N | U/D | U/D |
| Q16 | Y | Y | U/D | Y | Y | U/D | Y | Y | Y | Y | Y | Y | Y | Y | Y | Y | Y | Y | Y | Y | Y | Y | Y | Y | N | Y | Y | Y | Y | Y | Y | Y | Y | Y | Y | Y | U/D |
| Q17 | N/A | N/A | N/A | N/A | N/A | N/A | N | U/D | U/D | U/D | U/D | Y | U/D | Y | U/D | U/D | U/D | Y | U/D | U/D | U/D | Y | U/D | Y | Y | Y | Y | U/D | U/D | U/D | Y | Y | Y | Y | Y | Y | Y |
| Q18 | U/D | Y | Y | Y | Y | Y | Y | Y | Y | Y | Y | Y | Y | Y | Y | Y | Y | Y | Y | Y | Y | Y | Y | Y | Y | Y | Y | Y | Y | Y | Y | Y | Y | Y | Y | Y | Y |
| Q19 | N/A | N/A | N/A | N/A | N/A | N/A | N/A | N/A | N/A | N/A | N/A | N/A | N/A | N/A | N/A | N/A | N/A | N/A | N/A | N/A | Y | Y | Y | U/D | Y | Y | Y | Y | U/D | Y | U/D | Y | U/D | U/D | Y | U/D | Y |
| Q20 | U/D | Y | Y | Y | N | U/D | Y | Y | Y | Y | Y | Y | Y | Y | Y | Y | Y | Y | Y | Y | Y | Y | Y | Y | Y | Y | Y | Y | Y | Y | Y | Y | Y | Y | Y | Y | Y |
| Q21 | Y | Y | N | U/D | U/D | U/D | Y | Y | Y | U/D | U/D | Y | Y | Y | Y | N | Y | Y | U/D | Y | Y | Y | Y | U/D | Y | Y | U/D | Y | Y | Y | Y | Y | Y | Y | Y | Y | Y |
| Q22 | Y | Y | N | U/D | U/D | U/D | Y | U/D | Y | U/D | U/D | N | U/D | Y | U/D | U/D | Y | Y | Y | Y | Y | Y | U/D | Y | U/D | Y | Y | Y | Y | U/D | Y | Y | Y | Y | Y | U/D | Y |
| Q23 | N/A | N/A | N/A | N/A | N/A | N/A | N/A | N/A | N/A | N/A | N/A | N/A | N/A | N/A | N/A | N/A | N/A | N/A | N/A | N/A | Y | Y | Y | Y | Y | Y | U/D | Y | U/D | Y | Y | Y | Y | Y | U/D | Y | Y |
| Q24 | N/A | N/A | N/A | N/A | N/A | N/A | N/A | N/A | N/A | N/A | N/A | N/A | N/A | N/A | N/A | N/A | N/A | N/A | N/A | N/A | N | Y | U/D | Y | N | U/D | U/D | U/D | U/D | Y | U/D | Y | U/D | U/D | U/D | Y | U/D |
| Q25 | Y | U/D | U/D | U/D | U/D | Y | U/D | U/D | U/D | Y | Y | Y | Y | N | U/D | Y | Y | Y | Y | Y | U/D | Y | U/D | Y | Y | Y | U/D | N | U/D | Y | Y | Y | Y | Y | U/D | Y | Y |
| Q26 | N/A | N/A | N/A | N/A | N/A | N/A | U/D | U/D | U/D | U/D | U/D | U/D | U/D | U/D | U/D | U/D | U/D | U/D | U/D | U/D | U/D | Y | U/D | U/D | Y | U/D | N | Y | U/D | U/D | U/D | Y | Y | Y | Y | Y | U/D |
| Q27 | N/A | N/A | N/A | N/A | N/A | N/A | N | U/D | N | Y | U/D | Y | U/D | Y | N | Y | U/D | N | N | U/D | Y | Y | Y | Y | Y | U/D | N | Y | Y | N | Y | Y | Y | Y | Y | Y | Y |
| Total Score | 13 | 12 | 9 | 9 | 7 | 9 | 12 | 13 | 12 | 12 | 12 | 15 | 15 | 14 | 11 | 14 | 13 | 15 | 11 | 14 | 19 | 24 | 16 | 22 | 22 | 22 | 13 | 19 | 17 | 17 | 19 | 26 | 21 | 22 | 21 | 23 | 22 |

Y: Yes; N: No; P: Partially; N/A: Not applicable; U/D: Unable to determine.
